# Supplementary material for: High-throughput functional testing of ENCODE segmentation predictions
Source: HighWire-hosted journal article supplement (doi:10.1101/gr.173518.114), 2014-07-17
Supplement: SuppTables_Legends.docx [file SuppTables_Legends.docx]

**Supplementary Figures and Tables**

| **Segmentation prediction** | **repressed under 5% scrambled** | **repressed by Wilcoxon** |
| --- | --- | --- |
| K562 Enhancer | 6.02% [5.30%] | 6.83% [9.86%] |
| K562 Weak Enhancer | 4.00% [5.32%] | 7.33% [9.51%] |
| K562 Repressed | 3.52% [4.98%] | 7.67% [6.34%] |
| H1-hESC Enhancer | 2.50% [5.30%] | 10% [10.21%] |

**Supplemental Table 1. Percentage of repressed CREs by segmentation class.** For each ENCODE segmentation class, the table shows the percentage of all genomic CREs that are repressed, with the percentage of matched scrambled controls that are repressed in square brackets. Repression was determined by comparing CRE expression to the 5th percentile of matched scrambled controls (repressed under 5% scrambled) or by statistically comparing replicate measurements of expression to matched scrambled control distribution (repressed by Wilcoxon, Wilcoxon Rank Sum test, one-tailed, P<0.05, corrected using Bonferroni method with N=3236).

| **Chromatin Modification or Dataset** | **AUC** | **Wilcoxon p-value** |
| --- | --- | --- |
| Control | 0.523 | 0.135 |
| CTCF | 0.504 | 0.807 |
| Duke DNase I | 0.680 | 7.93x10-30 |
| FAIRE | 0.591 | 9.84x10-9 |
| H3K27ac | 0.523 | 0.150 |
| H3K27me3 | 0.523 | 0.142 |
| H3K36me3 | 0.553 | 8.34x10-4 |
| H3K4me1 | 0.551 | 1.32x10-3 |
| H3K4me2 | 0.536 | 0.0239 |
| H3K4me3 | 0.507 | 0.670 |
| H3K9ac | 0.517 | 0.274 |
| H3K20me1 | 0.531 | 0.0436 |
| Pol2 | 0.596 | 1.28x10-9 |
| UW DNase I | 0.685 | 2.27x10-31 |

**Supplemental Table 2: Predictive capability of single chromatin features. The AUC was calculated for** ROC curves created to classify active CREs vs. inactive CREs (see methods for details) using individual chromatin features. A Wilcoxon rank sum test (two-tailed, P<0.05, Bonferroni correction with N=14 for p-value threshold of 0.00357) was used to test for differences in the chromatin feature scores between activate CREs and inactive CREs.

| **Chromatin Modification or Dataset** | **p-value in high DNase I segments** | **p-value in segments with predicted AP-1 motif** |
| --- | --- | --- |
| Control | 2.70x10-5 | 0.819 |
| CTCF | 9.49x10-3 | 0.400 |
| Duke DNase I | 1.24x10-6 | 0.00258 |
| FAIRE | 0.0392 | 0.669 |
| H3K27ac | 1.18x10-4 | 0.827 |
| H3K27me3 | 0.131 | 0.0606 |
| H3K36me3 | 8.74x10-5 | 0.0163 |
| H3K4me1 | 0.0124 | 0.0890 |
| H3K4me2 | 5.58x10-3 | 0.189 |
| H3K4me3 | 2.83x10-5 | 0.879 |
| H3K9ac | 1.86x10-7 | 0.598 |
| H3K20me1 | 1.48x10-4 | 0.160 |
| Pol2 | 0.236 | 0.107 |
| UW DNase I | 0.134 | 0.0241 |

**Supplemental Table 3: Enrichment of single chromatin features in subsets of CREs**. Differences in the chromatin feature scores were calculated between active CREs and inactive CREs within subsets of the CREs (Wilcoxon Rank Sum Test, two-tailed, P<0.05, Bonferroni correction with N=14 for p-value threshold of 0.00357). CREs with high DNase I HS scores (UW DNase I HS score>5) or with a predicted AP-1 motif were analyzed.

| **Motif** | **Database** | **p-value** |
| --- | --- | --- |
| AP-1 (MA0099.2) | Jaspar | 7.68E-39 |
| Myc (MA0147.1) | Jaspar | 1.36E-07 |
| SPI1 (MA0080.2) | Jaspar | 1.14E-07 |
| Mycn (MA0104.2) | Jaspar | 1.19E-05 |
| ELF5 (MA0136.1) | Jaspar | 3.31E-06 |
| NFE2L2 (MA0150.1) | Jaspar | 5.99E-15 |
| Klf4 (MA0039.2) | Jaspar | 5.44E-12 |
| GABPA (MA0062.2) | Jaspar | 1.25E-15 |
| FEV (MA0156.1) | Jaspar | 9.86E-09 |
| Tal1:Gata1 (MA0140.1) | Jaspar | 1.12E-13 |
| SP1 (MA0079.2) | Jaspar | 7.04E-12 |
| Zfx (MA0146.1) | Jaspar | 7.17E-06 |
| ELF3 | High-throughput SELEX | 3.67E-09 |
| ZNF740_v2 | High-throughput SELEX | 8.38E-08 |
| SP8 | High-throughput SELEX | 1.29E-06 |
| SP1 | High-throughput SELEX | 1.88E-12 |
| SP3 | High-throughput SELEX | 1.06E-11 |
| SP4 | High-throughput SELEX | 6.36E-10 |
| EHF^ | High-throughput SELEX | 2.83E-11 |
| JDP2_v3 | High-throughput SELEX | 5.88E-15 |
| ELF5_v2 | High-throughput SELEX | 5.69E-12 |
| ERG | High-throughput SELEX | 2.89E-07 |
| ERF | High-throughput SELEX | 3.04E-07 |
| Jdp2 | High-throughput SELEX | 8.40E-21 |
| Elk3 | High-throughput SELEX | 8.05E-07 |
| ELK3^ | High-throughput SELEX | 4.31E-07 |
| ELK4^ | High-throughput SELEX | 1.23E-07 |
| ELK1^ | High-throughput SELEX | 1.75E-06 |
| ETS1_v3^ | High-throughput SELEX | 3.51E-08 |
| ERG_v3^ | High-throughput SELEX | 2.38E-10 |
| ETS1^ | High-throughput SELEX | 6.28E-09 |
| ELF3_v2 | High-throughput SELEX | 1.53E-07 |
| Klf12 | High-throughput SELEX | 1.00E-05 |
| ELK1_v2^ | High-throughput SELEX | 1.90E-07 |
| EGR3 | High-throughput SELEX | 2.59E-05 |
| NFE2 | High-throughput SELEX | 2.50E-25 |
| GABPA | High-throughput SELEX | 5.65E-09 |
| KLF16 | High-throughput SELEX | 3.58E-11 |
| FLI1_v3^ | High-throughput SELEX | 2.64E-07 |
| FLI1^ | High-throughput SELEX | 1.03E-06 |
| ETV6_v2 | High-throughput SELEX | 3.48E-10 |
| Elf5^ | High-throughput SELEX | 4.16E-08 |
| ETV1^ | High-throughput SELEX | 2.43E-05 |
| ETV2 | High-throughput SELEX | 7.74E-10 |
| ETV4^ | High-throughput SELEX | 3.51E-07 |
| ELF1_v2 | High-throughput SELEX | 5.34E-07 |
| FEV^ | High-throughput SELEX | 2.55E-05 |
| JDP2 | High-throughput SELEX | 1.22E-20 |
| ELF1 | High-throughput SELEX | 1.60E-11 |
| ELF5 | High-throughput SELEX | 5.79E-12 |
| ELF4 | High-throughput SELEX | 6.94E-09 |
| Ehf | UniPROBE | 5.30E-06 |
| Sp4 | UniPROBE | 1.15E-05 |
| Klf7 | UniPROBE | 1.56E-12 |
| Ehf_v2^ | UniPROBE | 9.53E-06 |
| Jundm2_v3 | UniPROBE | 3.75E-30 |
| Jundm2_v4^ | UniPROBE | 3.75E-30 |
| Gabpa | UniPROBE | 5.49E-08 |
| Pho4.primary | UniPROBE | 2.12E-06 |
| Gcn4.DBD.primary | UniPROBE | 2.17E-27 |
| HLH.27 | UniPROBE | 1.28E-05 |
| Zfp281 | UniPROBE | 1.11E-07 |
| Ascl2_v3 | UniPROBE | 3.85E-09 |
| Ascl2_v4^ | UniPROBE | 3.85E-09 |
| Sp4_v2^ | UniPROBE | 2.39E-05 |
| Egr1_v2 | UniPROBE | 2.60E-08 |
| Sfpi1 | UniPROBE | 1.82E-05 |
| Egr1^ | UniPROBE | 2.99E-08 |
| Klf7_v2^ | UniPROBE | 5.47E-13 |
| MXL.3 | UniPROBE | 2.86E-07 |
| Gabpa_v2^ | UniPROBE | 2.82E-09 |
| Zfp281_v2^ | UniPROBE | 1.09E-07 |
| MXL.3_v2^ | UniPROBE | 2.86E-07 |

**Supplemental Table 4: Enriched Motifs in Activated Sequences**. These predicted motifs (see methods for sources) were found to have a significantly different distribution of appearances in the active CREs vs. inactive CREs by Wilcoxon test (P<0.05, two-tailed, Bonferroni correction with N=1687). ^ symbol indicates that the motif was subsequently removed for further analysis because it was highly redundant with another motif.

| **Model** | **Number of Parameters** | **AIC** | **AUC** | **Mean AUC from 5x cross-validation** |
| --- | --- | --- | --- | --- |
| Histone and PSF | 8 | 1881.5 | 0.733 | 0.722 |
| TF ChIP | 8 | 2007 | 0.622 | 0.5974 |
| Binding | 50 | 1728.9 | 0.802 | 0.758 |
| Comprehensive | 66 | 1643.3 | 0.841 | 0.798 |

**Supplemental Table 5: Logistic Regression Models.** The four logistic regression models used to predict active CREs from our assay: “Histone and primary sequence features (PSF)” includes histone features, GC-content, and ORChID2 score; “TF ChIP” includes peaks from TF ChIP-seq; “Binding” includes predicted binding models for TFs; and “Comprehensive” includes parameters from all of the models. Akaike Information Criteria (AIC), area under the curve (AUC) using the full data for training and testing, and the mean AUC from 5-fold cross-validation (CV) are listed for each model.

| **Name** | **Sequence** |
| --- | --- |
| Primer CF121 | TAGCGTCGAGGACATCAAGA |
| Primer CF150 | TACACCGTGGTGGAGCAGTA |
| Primer CF151b | AGCGTACTCGAGTTGTTAACTTGTTTATTGCAGCTT |
| Primer CF168 | ATGCATGCCTAGAATTACTACTGGAACA |
| Primer JKO25F | CATCAAGCTTCTCCTCCGGCTCGCT |
| Primer JKO25R | CGTTGTAAAACGACGGGATC |
| Adapter MO576 | AATGATACGGCGACCACCGAGATCTACACTCTTTCCCTACACGACGCTCTTCCGATCTGCTCGATCATG |
| Adapter MO577 | AATGATACGGCGACCACCGAGATCTACACTCTTTCCCTACACGACGCTCTTCCGATCTTAGACTATCATG |
| Adapter MO578 | AATGATACGGCGACCACCGAGATCTACACTCTTTCCCTACACGACGCTCTTCCGATCTCGCTACCCTCATG |
| Adapter MO579 | AATGATACGGCGACCACCGAGATCTACACTCTTTCCCTACACGACGCTCTTCCGATCTATAGTGGACACATG |
| Adapter MO582 | ATCGAGCAGATCGGAAGAGCGTCGTGTAGGGAAAGAGTGTAGATCTCGGTGGTCGCCGTATCATT |
| Adapter MO583 | ATAGTCTAAGATCGGAAGAGCGTCGTGTAGGGAAAGAGTGTAGATCTCGGTGGTCGCCGTATCATT |
| Adapter MO584 | AGGGTAGCGAGATCGGAAGAGCGTCGTGTAGGGAAAGAGTGTAGATCTCGGTGGTCGCCGTATCATT |
| Adapter MO585 | TGTCCACTATAGATCGGAAGAGCGTCGTGTAGGGAAAGAGTGTAGATCTCGGTGGTCGCCGTATCATT |
| POS1 | CTAGCCTCAAGCACAGCAATGCTGAGTCATGATGAGTCATGCTGAGGCTTAA |
| POS2 | AGCTTTAAGCCTCAGCATGACTCATCATGACTCAGCATTGCTGTGCTTGAGG |

**Supplemental Table 6: Oligonucleotide sequences used in this study.**

**Supplemental Figure 1: Luciferase assay expression measurements.** Barplot showing luciferase assay expression driven by 12 CREs and 3 controls. The 12 CREs from the CRE-seq library are grouped by CRE-seq expression (Low, Middle, High). “Pos” is the positive control from the HS II enhancer; “minP” is the minimal promoter with no enhancer; and “Neg” is the no vector control. The x-axis is sorted by CRE-seq expression (minP uses the basal promoter CRE-seq value), with the exception of the controls, which were not measured by CRE-seq. Error bars represent the standard error of the mean of two or three transfections per CRE.

**Supplemental Figure 2. Computing the fraction of active sequences does not depend on the method of choosing short segments.** Histograms showing the distribution of expression for each class; **A)** Enhancers (blue), **B)** Weak Enhancers (green), **C)** H1-hESC Enhancers (orange); either for the sequences from the center of longer segments (“Center”), or from whole short segments (“Short”), compared to their matched scrambled controls (grey). The dashed lines indicate the 5th and 95th percentiles of the scrambled distribution. The percentage of elements with expression greater than the scrambled 95th percentile is indicated.

**Supplemental Figure 3. Weak Enhancers control higher median expression than Enhancers.** Histogram of expression measurements, showing the distribution of Weak Enhancers (green) shifted to the right of that of Enhancers (blue). Lines show median expression for Enhancers (dotted) and Weak Enhancers (dashed).

**Supplemental Figure 4. Expression and GC Fraction of Scrambled CREs. A)** Histograms showing the expression controlled by each set of scrambled sequences. **B)** Boxplots show the distribution of GC fraction for each category of scrambled sequences.

**Supplemental Figure 5. Active Weak Enhancer and Enhancer CREs have lower levels of H3K36me3 and H3K27ac.** Boxplots showing that H3K27ac signal and H3K36me3 signal are depleted in active CREs compared to inactive CREs. Plots are similar to 2A and 2C except data is separated by segmentation class. Active CREs are those above the 95th percentile of the scrambled distribution (Table 1).

**Supplemental Figure 6. Diagram of 200-mer Oligos Used to Construct the CRE-seq Library**. Red sequences are used for PCR priming and blue sequences are restriction enzyme sites. The *CRE* is the 121-130bp sequence from the genomic predictions or scrambled controls. The *FILL* is 0-9bp of random sequence to bring the length of the whole oligo sequence up to 200bp. The length of the FILL sequence is calculated as 130-length of CRE. The *BARCODE* is a 9bp sequence that will label the 3’ UTR of the mRNA transcript.

**Supplemental Data 1. Sequence of CREs**. This fasta file contains the sequence of each *cis*-regulatory element used in the experiment, with genomic coordinates (hg19) and sequence properties in the name field. Name format: chr1:71229000-71229121_X_YZ, where X is cell type (‘K’ for K562 and ‘ES’ for H1-hESC), Y is segmentation class (‘W’ is Weak Enhancer, ‘S’ is Enhancer, ‘R’ is Repressed), and Z is location in segment (‘C’ is center of longer segments, ‘S’ is entire short segments). If ‘M’ follows Z, the CRE is a scrambled version of the genomic sequence.

**Supplemental Data 2. Expression of barcodes.** The CRE name is described in the legend for Supplemental Data 1. BC is the barcode sequence. Exp_mean is the mean expression across the four biological replicates.

**Supplemental Data 3. Expression of CREs.** The CRE name is described in the legend for Supplemental Data 1. Exp_mean and SEM are the mean expression and standard error of the mean for each CRE, calculated as described in the methods.

**Supplemental Data 4. Luciferase expression values**. The CRE name is described in the legend for Supplemental Data 1. CRE-seq_expression_category is one of three categories (Low, Middle, High) based on CRE-seq expression. Luciferase_mean is the mean expression, and Luciferase_SEM is the standard error of the mean for biological replicates (up to three transfections).
